# Supplementary material for: Structural snapshots of Xer recombination reveal activation by synaptic complex remodeling and DNA bending
Source: eLife. 2016 Dec 23;5:e19706. doi: 10.7554/eLife.19706 (PMC5241119; doi:10.7554/eLife.19706)
Supplement: Figure 3—source data 1. — The original gels are shown in Figure 3—figure supplement 1. DOI: http://dx.doi.org/10.7554/eLife.19706.011 [file elife-19706-fig3-data1.xlsx]

## Sheet: Sheet1
	Figure 3–source data 1: Quantification of XerH binding to difH variants based on EMSA experiments.
	XerH-difH	Protein concentration	Free DNA	Monomeric complex	Dimeric complex	Total complex	Total	% complex
		0	20	0	0	0	20	0
		40	70.92		1.35	1.35	72.27	1.868
		60	137.4	0.92	2.39	3.31	140.71	2.35236
		80	211.56	2.15	6.15	8.3	219.86	3.77513
		100	199.75	3.15	7.61	10.76	210.51	5.1114
		120	174.63	5.7	19.13	24.83	199.46	12.4486
		140	149.43	9.44	47.95	57.39	206.82	27.7488
		160	80.17	11.51	107.1	118.61	198.78	59.669
		180	39.01	13.17	186.18	199.35	238.36	83.634
		200	21.52	9.12	197.03	206.15	227.67	90.5477
		240	3.25	4.96	205.04	210	213.25	98.476
		280	0.71	3.68	189.59	193.27	193.98	99.634
		320	0	6.87	218.38	225.25	225.25	100
		360	0	5.31	219.71	225.02	225.02	100
	XerH-difHL	Protein concentration	Free DNA	Monomeric complex	Dimeric complex	Total complex	Total	% complex
		0	20	0	0	0	20	0
		40	19.08	0	0	0	19.08	0
		60	18.63	0	0	0	18.63	0
		80	23.8	1.72	0	1.72	25.52	6.73981
		100	29.77	5.62	0	5.62	35.39	15.8802
		120	32.75	6.21	0	6.21	38.96	15.9394
		140							-> unquantifiable (all sample stayed in the well)
		160	25.27	15.39	0.36	15.75	41.02	38.3959
		180	29.13	24.24	1.26	25.5	54.63	46.6776
		200	23.3	13.16	0.52	13.68	36.98		-> outlier (gel loading problem)
		240	8.59	10.82	17.31	28.13	36.72	76.6068
		280	4.63	7.27	34.45	41.72	46.35	90.0108
		320	3.07	6.04	41.87	47.91	50.98	93.978
		360	3.7	7.32	48.04	55.36	59.06	93.7352
	XerH-difHR	Protein concentration	Free DNA	Monomeric complex	Dimeric complex	Total complex	Total	% complex
		0	20	0	0	0	20	0
		40	24.75	0	0	0	24.75	0
		60	23.09	0	0	0	23.09	0
		80	25.31	0	0	0	25.31	0
		100	30.36	0.13	0	0.13	30.49	0.426369
		120	31.38	0.53	0	0.53	31.91	1.66092
		140	32.8	1.38	0	1.38	34.18	4.03745
		160	36.14	1.2	0	1.2	37.34	3.21371
		180	28.63	7.78	0	7.78	36.41	21.3678
		200	17.12	6.45	0	6.45	23.57	27.3653
		240	8.65	11.54	2.29	13.83	22.48	61.5214
		280	1.96	7.17	9.93	17.1	19.06	89.7167
		320	1	4.52	14.43	18.95	19.95	94.9875
		360	0.86	4.84	14.53	19.37	20.23	95.7489
	XerH-Random DNA	Protein concentration	Free DNA	Monomeric complex	Dimeric complex	Total complex	Total	% complex
		0	11.06	0	0	0	11.06	0
		40	11.32	0	0	0	11.32	0
		60	11.42	0	0	0	11.42	0
		80	13.6	0	0	0	13.6	0
		100	16.79	0	0	0	16.79	0
		120	20	0	0	0	20	0
		140	31.56	0	0	0	31.56	0
		160	33.42	0	0	0	33.42	0
		180	30.16	0	0	0	30.16	0
		200	27.68	0	0	0	27.68	0
		240	23.65	0.67	1.91	2.58	26.23	9.83607
		280	22.97	0.75	3.18	3.93	26.9	14.6097
		320	21.21	0.6	4.56	5.16	26.37	19.5677
		360	17.63	0.61	8	8.61	26.24	32.8125
	XerH K290S-difH	Protein concentration	Free DNA	Monomeric complex	Dimeric complex	Total complex	Total	% complex
		0	18.11			0	18.11	0
		40	20		0.22	0.22	20.22	1.08803
		60	21.4	0.37	1.54	1.91	23.31	8.19391
		80	24.43	0.92	4.08	5	29.43	16.9895
		100	24.06	0.62	4.69	5.31	29.37	18.0797
		120	23.99	1.72	8.21	9.93	33.92	29.2748
		140	19.62	2.03	11.61	13.64	33.26	41.0102
		160	12.68	2.19	16.65	18.84	31.52	59.7716
		180	7.32	2.31	20.39	22.7	30.02	75.6163
		200	3.53	3.79	21.76	25.55	29.08	87.8611
		240	1.3	3.63	22.72	26.35	27.65	95.2984
		280	0.21	2.96	26.05	29.01	29.22	99.2813
		320	0.19	1.59	42.88	44.47	44.66	99.5746
		360	0.19	1.39	43.83	45.22	45.41	99.5816
