# Supplementary material for: Structural snapshots of Xer recombination reveal activation by synaptic complex remodeling and DNA bending
Source: eLife. 2016 Dec 23;5:e19706. doi: 10.7554/eLife.19706 (PMC5241119; doi:10.7554/eLife.19706)
Supplement: Figure 3—source data 2. — Colony counts and recombination rates are tabulated and their statistical analysis by Student’s t-test is shown. DOI: http://dx.doi.org/10.7554/eLife.19706.012 [file elife-19706-fig3-data2.xlsx]

## Sheet: Sheet1
	Figure 3–source data 2: Results of the in vivo recombination assays. Colony counts, recombination rates are tabulated and their statistical analysis by Student’s t-test is shown.
		Figure 3E
				Replicates	white colonies	Total colonies	Recombination rates (%)	Average	SD	p value (Student's t-test)
			WT	1	55	532	10.3383
				2	178	1522	11.6951
				3	65	837	7.76583	9.9331	1.99575	-
			WT+LP	1	62	996	6.2249
				2	145	1548	9.36693
				3	138	1763	7.82757	7.80646	1.57112	0.220612
			LP+LP	1	139	520	26.7308
				2	329	968	33.9876
				3	482	1744	27.6376	29.452	3.95404	0.00158213
			WT+RP	1	2	130	1.53846
				2	14	859	1.6298
				3	13	509	2.55403	1.90743	0.561829	0.00257538
			RP+RP	1	6	825	0.727273
				2	10	911	1.09769
				3	15	718	2.08914	1.3047	0.704136	0.00212119
			GT->CA	1	13	565	2.30088
				2	20	1211	1.65153
				3	52	1400	3.71429	2.55557	1.0547	0.00480035
			GT->CC	1	11	686	1.6035
				2	24	1399	1.71551
				3	15	646	2.32198	1.88033	0.38656	0.00236273
			XerH R213K - WT DNA
				1	0	>200	0
				2	0	>200	0
				3	0	>200	0	0	0	0.000995421
		Figure 3–figure supplement 2, Panel B
				Replicates	white colonies	Total colonies	Recombination rates (%)	Average	SD	p value (Student's t-test)
			ATAA-WT	1	55	532	10.3
				2	178	1522	11.7
				3	65	837	7.8	9.93333	1.97569	-
			ACAA	1	17	250	6.8
				2	29	678	4.27729
				3	144	1816	7.92952	6.3356	1.86988	0.0837866
			AGAA	1	58	954	6.07966
				2	120	1510	7.94702
				3	170	1728	9.83796	7.95488	1.87916	0.27722
			AAAA	1	45	903	4.98339
				2	138	1321	10.4466
				3	208	1421	14.6376	10.0225	4.84105	0.977843
		Figure 3–figure supplement 2, Panel D
				Replicates	white colonies	Total colonies	Recombination rates (%)	Average	SD	p value (Student's t-test)
			WT	1	55	532	10.3383
				2	178	1522	11.6951
				3	65	837	7.76583	9.9331	1.99575	-
			XerH K290S -WT DNA	1	30	745	4.02685
				2	16	321	4.98442
				3	4	88	4.54545	4.51891	0.479341	0.0102695
