# Supplementary material for: Structural snapshots of Xer recombination reveal activation by synaptic complex remodeling and DNA bending
Source: eLife journal article supplement (doi:10.7554/elife.19706), 2016-12-23
Supplement: supp [file elife-19706-supp-v1.zip]

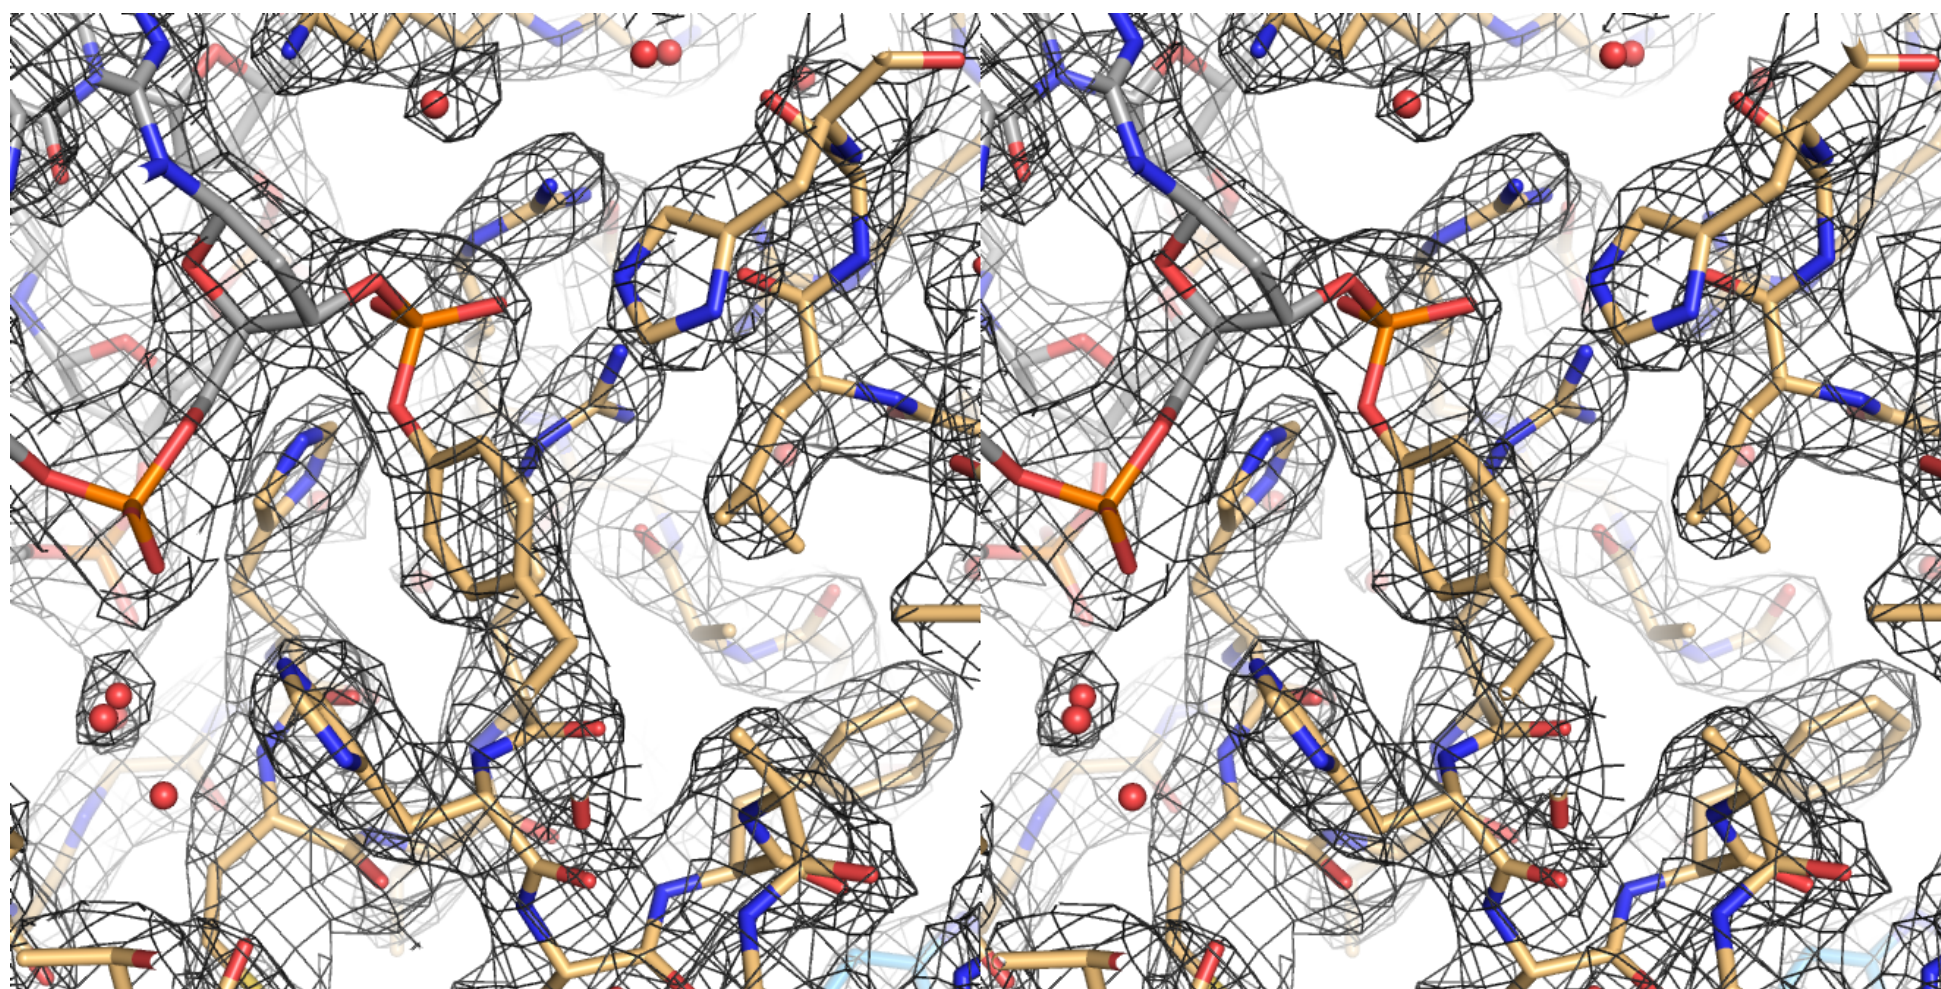

**Figure 4—figure supplement 1: Cross-eyed stereo image of the bias-minimized 2Fo-Fc composite omit electron density map of the post-cleavage XerH-*dif<sub>H</sub>* complex structure.**

The map (black mesh) shows the region of the active site of the active subunit contoured at 1.2 sigma level. Protein (gold) and DNA (gray) residues are shown as sticks with atomic coloring; water molecules are shown as red spheres.
