# Supplementary material for: Structural snapshots of Xer recombination reveal activation by synaptic complex remodeling and DNA bending
Source: eLife journal article supplement (doi:10.7554/elife.19706), 2016-12-23
Supplement: supp [file elife-19706-supp-v1.zip]

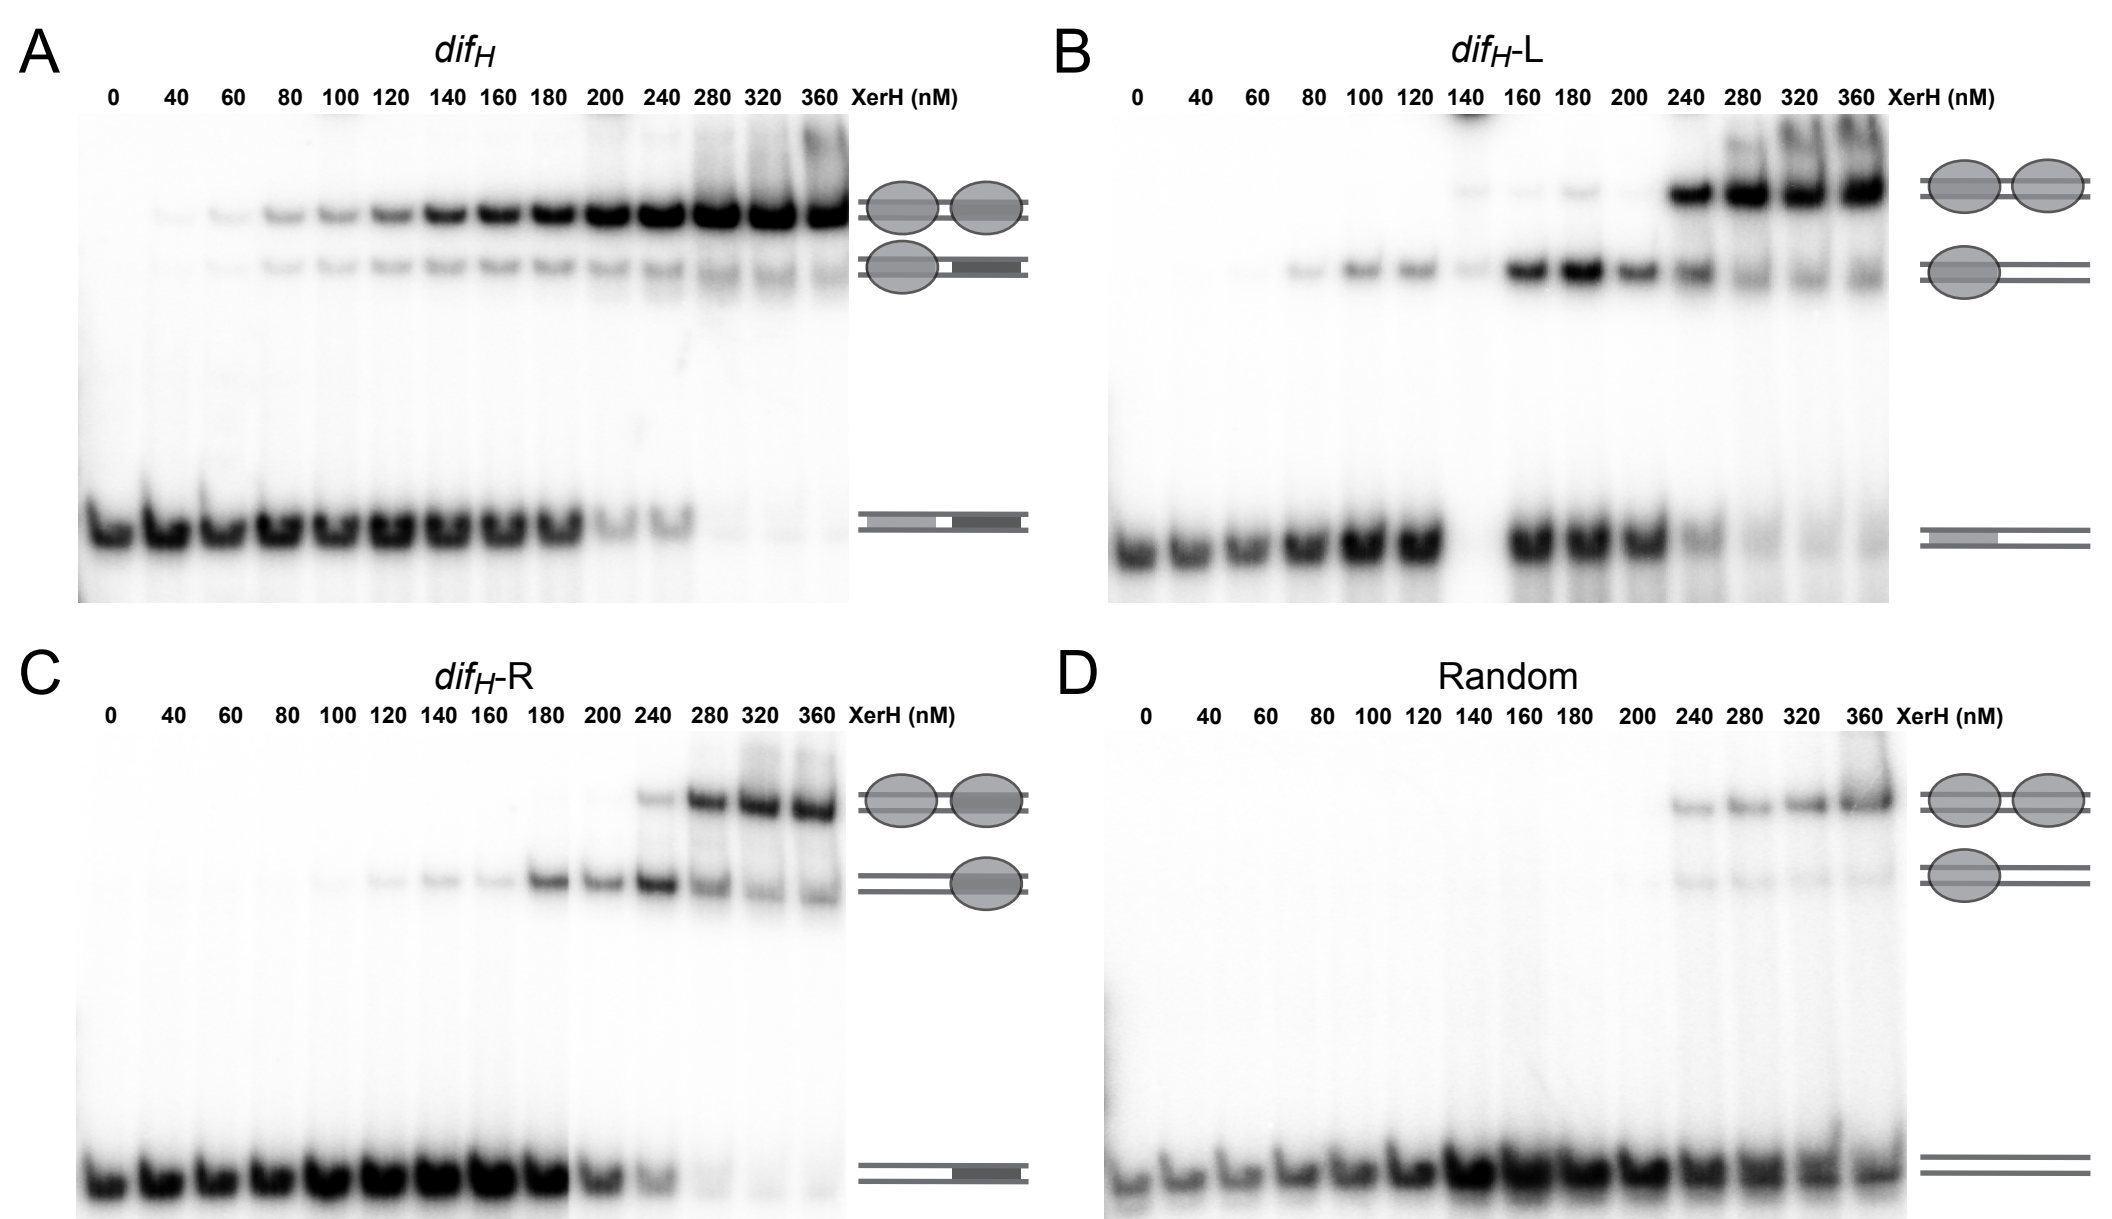

**Figure 3-figure supplement 1: Electrophoretic mobility shift assay (EMSA) gels showing XerH binding to *dif<sub>H</sub>* and derivatives.**

EMSA was performed with 50-bp substrates containing wild-type *dif<sub>H</sub>* (**A**), left arm of *dif<sub>H</sub>* accompanied by a random sequence (**B**), right arm of *dif<sub>H</sub>* preceded by a random sequence (**C**), or fully randomized sequence with matched GC content (**D**). The resulting bands correspond to free DNA, DNA bound to one XerH monomer (gray oval), or DNA bound to two XerH monomers, as indicated by the schematics on the right hand side of the gels. These complex stoichiometries are derived from analytical SEC and supported by EMSA with hlf-site *dif<sub>H</sub>* DNA (data not shown).
