# Supplementary material for: Structural snapshots of Xer recombination reveal activation by synaptic complex remodeling and DNA bending
Source: eLife journal article supplement (doi:10.7554/elife.19706), 2016-12-23
Supplement: supp [file elife-19706-supp-v1.zip]

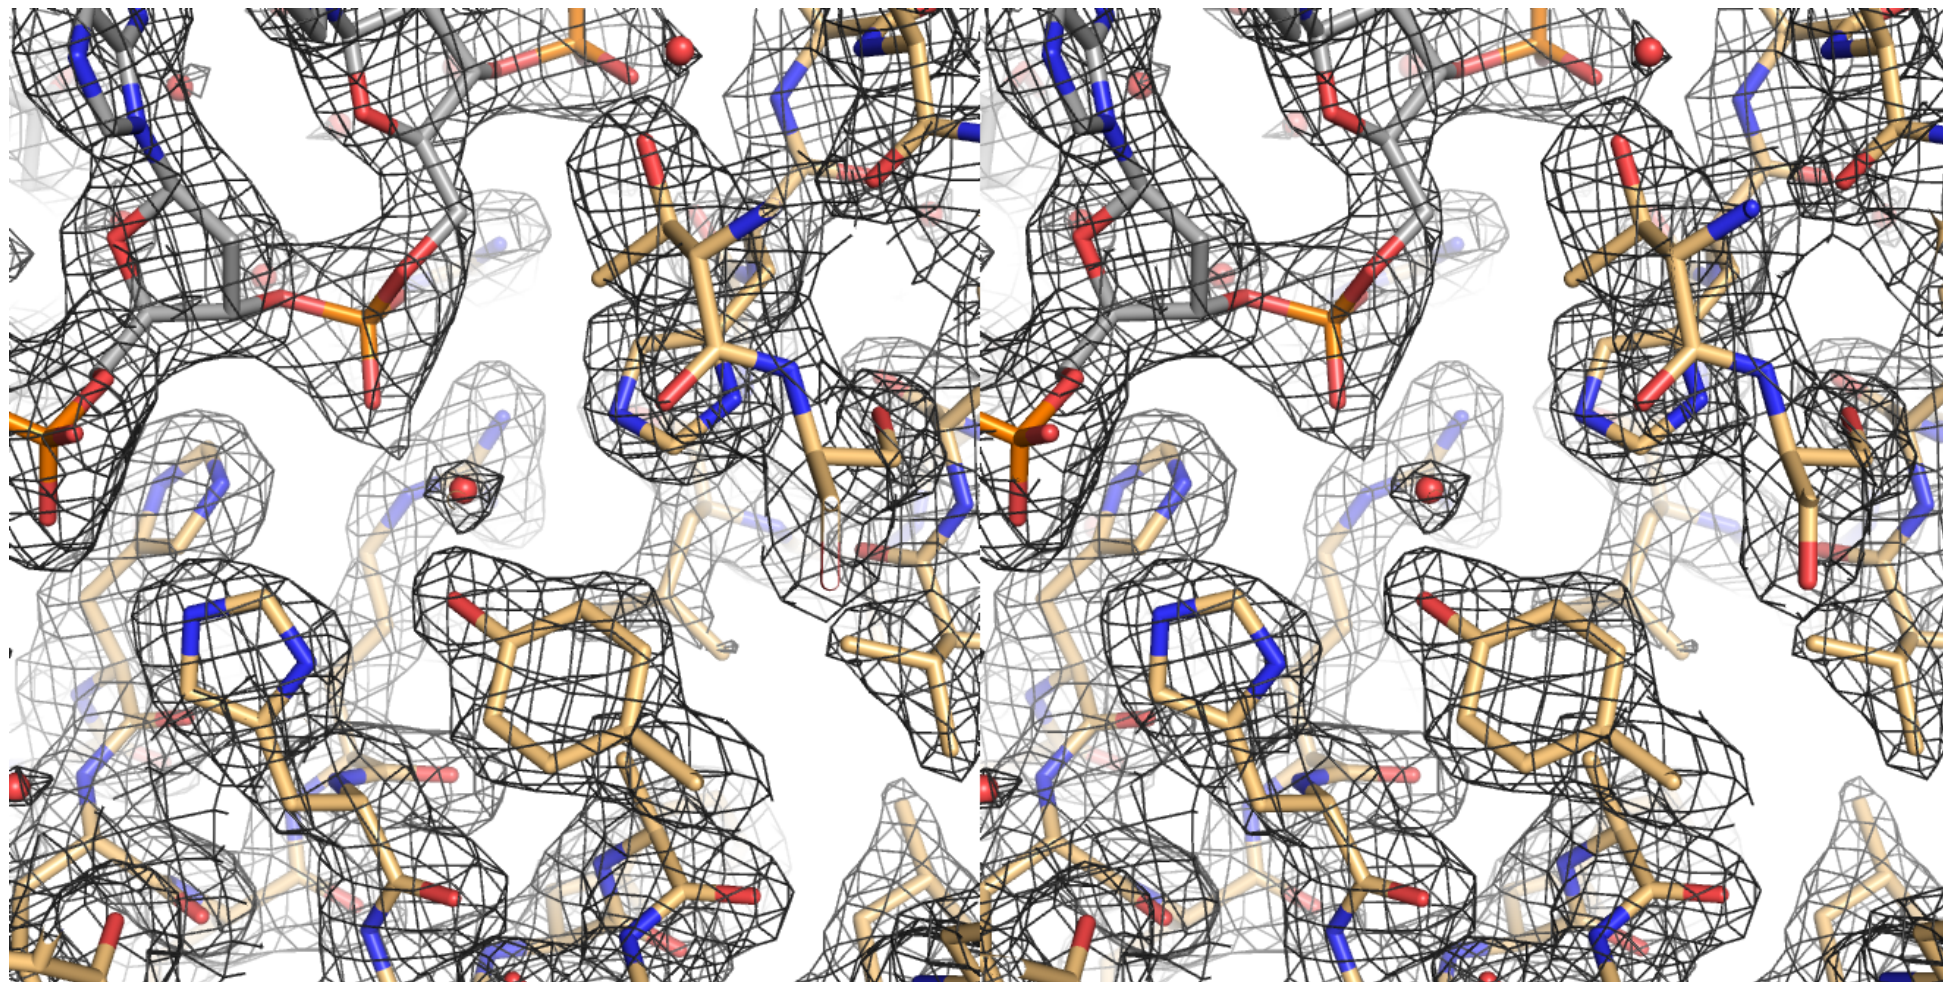

**Figure 2—figure supplement 2: Cross-eyed stereo image of the bias-minimized 2Fo-Fc composite omit electron density map of the pre-cleavage XerH-*dif<sub>H</sub>* complex structure.**

The map (black mesh) shows the region of the active site of the left arm-bound subunit contoured at 1.2 sigma level. Protein (gold) and DNA (gray) residues are shown as sticks with atomic coloring; water molecules are shown as red spheres.
