# Supplementary material for: Structural snapshots of Xer recombination reveal activation by synaptic complex remodeling and DNA bending
Source: eLife journal article supplement (doi:10.7554/elife.19706), 2016-12-23
Supplement: supp [file elife-19706-supp-v1.zip]

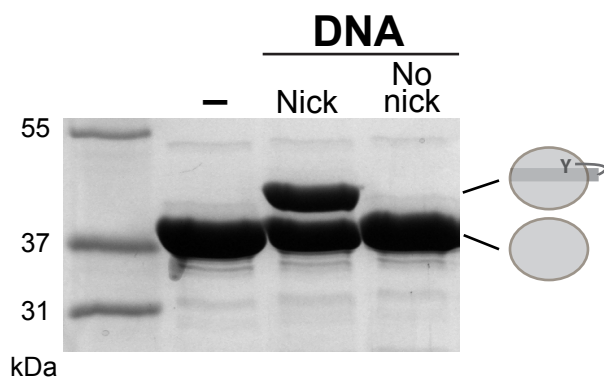

**Figure 6—figure supplement 1: XerH activity on intact and nicked *dif<sub>H</sub>* substrates.**

XerH is unable to cleave intact *dif<sub>H</sub>* substrates, as assessed by DNA cleavage assays on SDS-PAGE. Wild-type *dif<sub>H</sub>* with or without ‘suicide’ nicks was used as indicated. (-) denotes no-DNA control.
