# Supplementary material for: Structural snapshots of Xer recombination reveal activation by synaptic complex remodeling and DNA bending
Source: eLife journal article supplement (doi:10.7554/elife.19706), 2016-12-23
Supplement: supp [file elife-19706-supp-v1.zip]

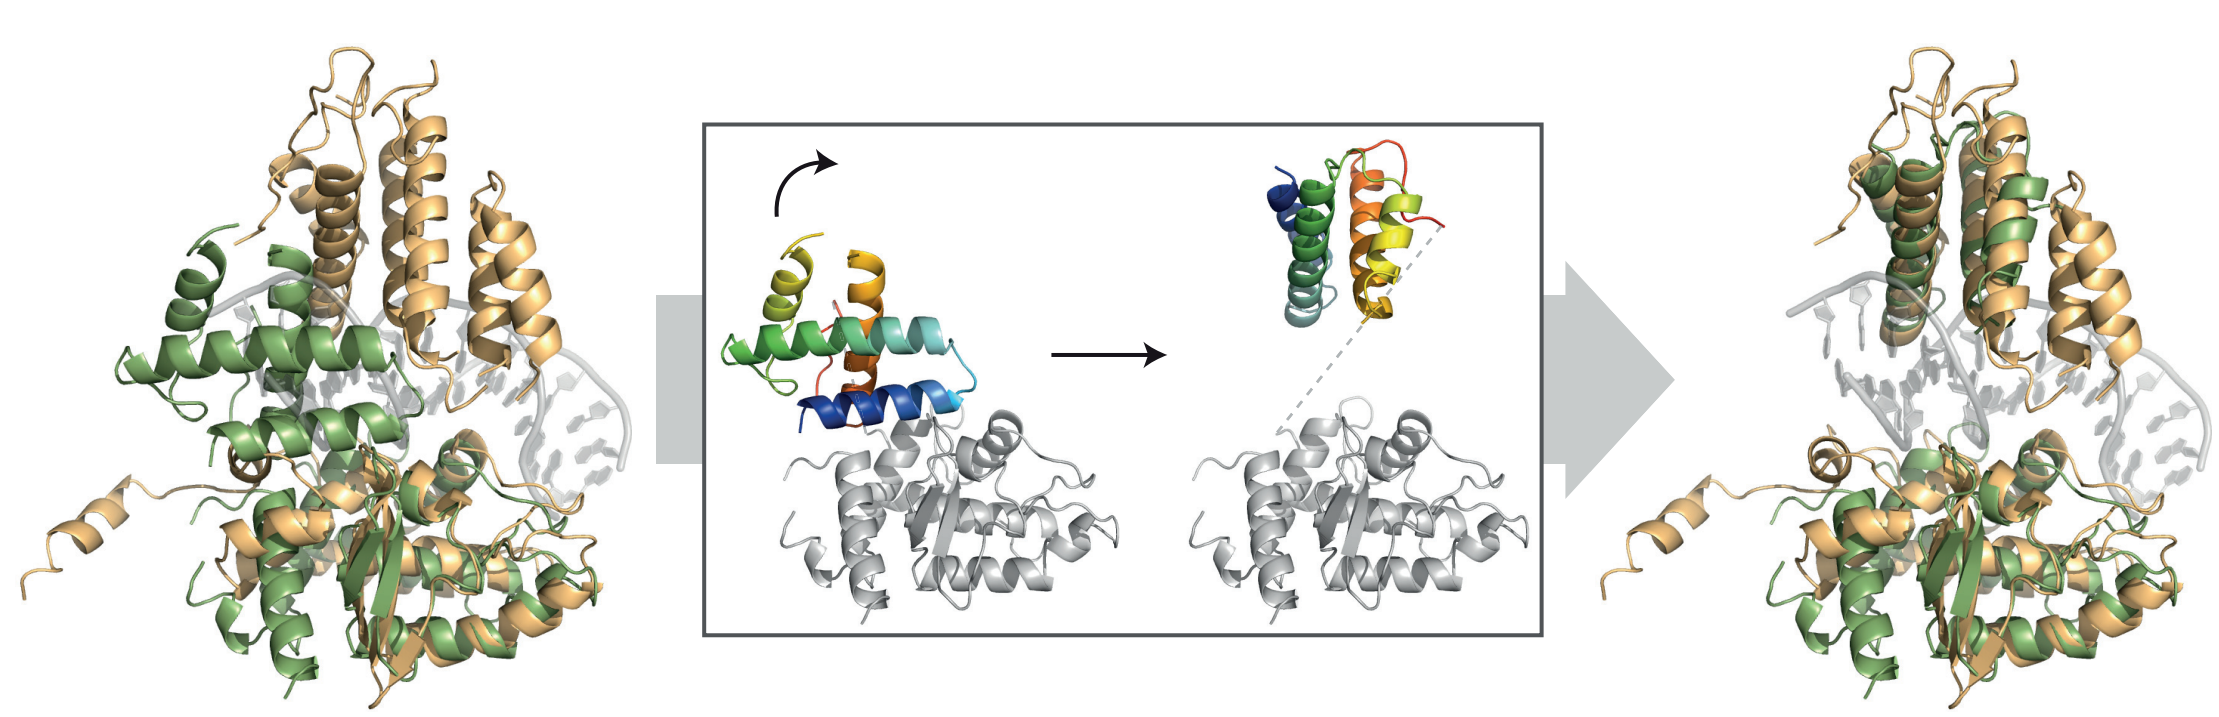

**Figure 2-figure supplement 3: Comparison of the DNA-bound XerH (gold) and DNA-free XerD (1aOp; green) structures.**

The insert shows how a rotation of the N-terminal domain (in rainbow coloring from blue for N-terminus to red for C-terminus) can lead to opening of the XerD clamp in order to accommodate a DNA duplex without clashes.
