# Supplementary material for: Structural snapshots of Xer recombination reveal activation by synaptic complex remodeling and DNA bending
Source: eLife journal article supplement (doi:10.7554/elife.19706), 2016-12-23
Supplement: supp [file elife-19706-supp-v1.zip]

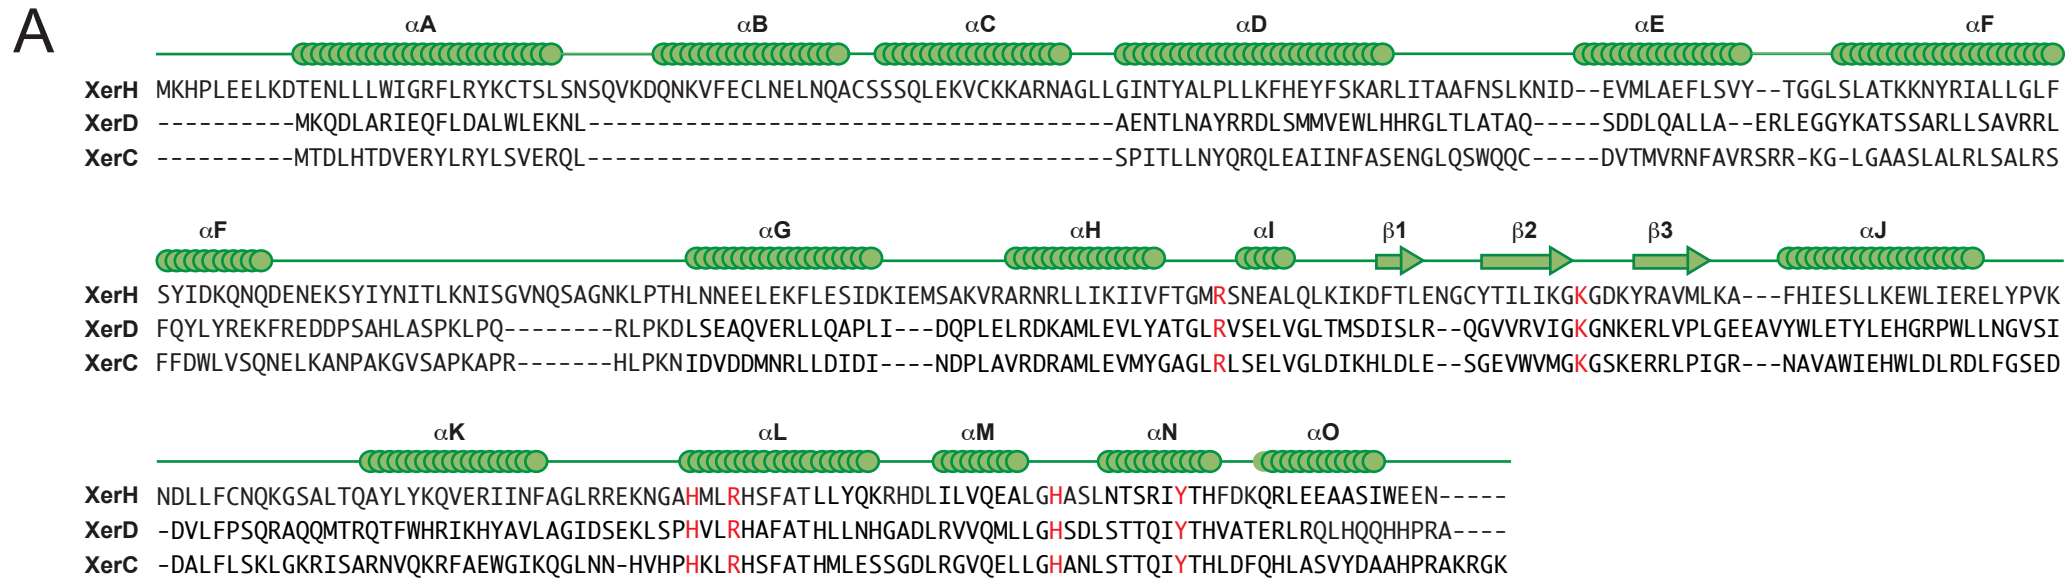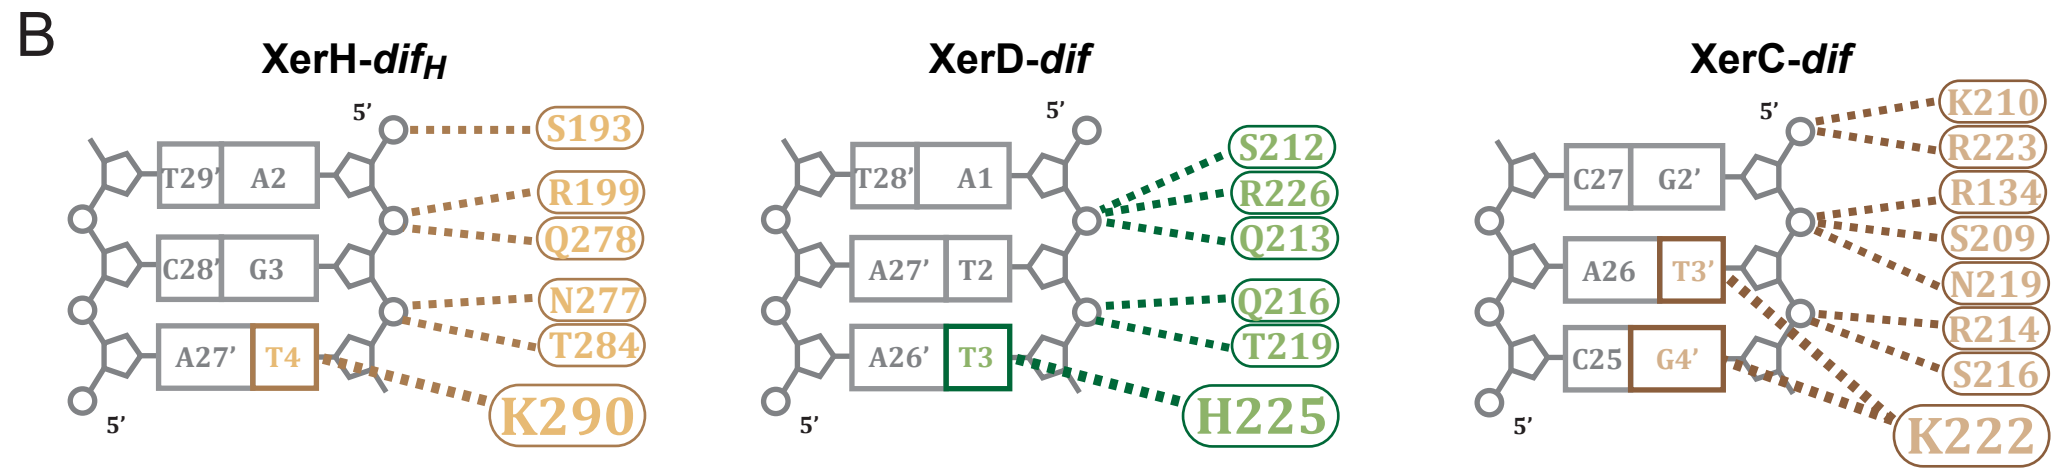

**Figure 5–figure supplement 1: Modeling of XerC/D-*dif* synaptic complexes.**

**A)** Secondary structure-based alignment of XerH, XerD, and XerC.  $\alpha$ -helices and  $\beta$  strands are marked above, conserved catalytic residues are in red.

**B)** Schematic view of the interactions of XerH, XerD, and XerC with the outer base-pairs of their respective binding sites. Dashes indicate hydrogen bonds.
